# Supplementary material
Source: PubMed Central journal article supplement (PMC3889604)
Supplement: JB.00946-13_zjb999092934so1.pdf [file JB.00946-13_zjb999092934so1.pdf]

## Supplemental Material for:

# Cellulose as an architectural element in spatially structured *Escherichia coli* biofilms

*Diego O. Serra, Anja R. Richter and Regine Hengge*

Institut für Biologie - Mikrobiologie, Freie Universität Berlin, 14195 Berlin, Germany

### Contents:

#### 1. Supplementary Figures:

- Fig. S1: Construction of single copy *lacZ* reporter fusions to *yhiR*, *bcsQ* and *bcsA* and  $\beta$ -galactosidase activities in colonies of fusion-carrying strains
- Fig. S2: FLAG-tagging reveals the expression and temperature regulation of cellulose synthase (BcsA) in strain AR3110 but not in W3110
- Fig. S3: Cryosection through the outer growth zone of a 5-day-old macrocolony of strain AR3110 grown in the presence of thioflavine S.

#### 2. Supplementary Table S1: Oligonucleotides

#### 3. In addition available: Supplementary Movies:

- Movie S1: Dissolution by shear forces of a cellulose- and curli-free macrocolony
- Movie S2: Dissolution by shear forces of a macrocolony producing curli only
- Movie S3: Dissolution by shear forces of a macrocolony producing curli and cellulose

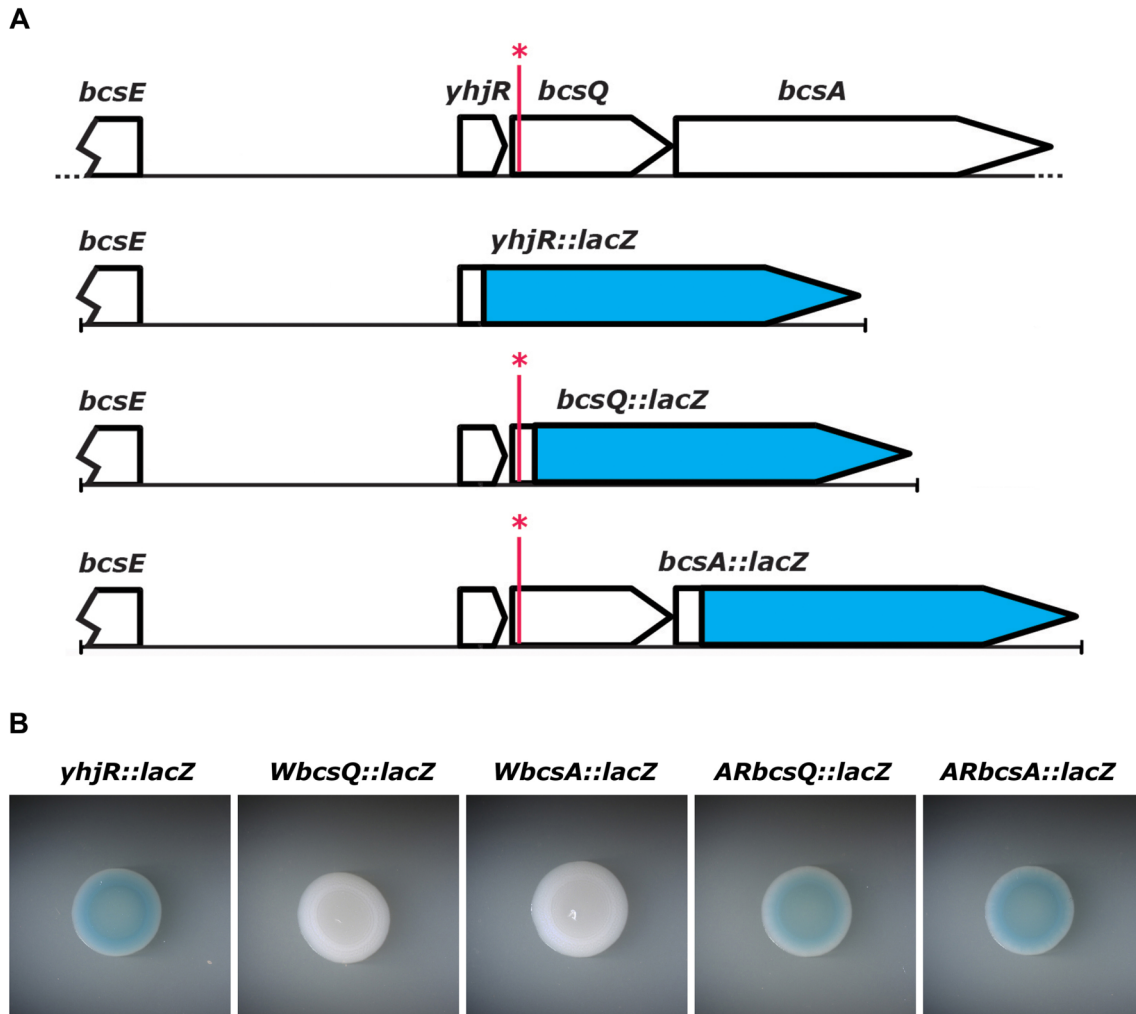

**Figure S1. Construction of single copy *lacZ* reporter fusions to *yhiR*, *bcsQ* and *bcsA* and  $\beta$ -galactosidase activities in colonies of fusion-carrying strains. **A:** The latter two fusions were constructed with TAG ('W' fusions) or TTC ('AR' fusions) in codon 6 of *bcsQ* (position indicated by a red asterisk). Lengths of genes and intergenic regions are not drawn to scale. **B:** Different  $\beta$ -galactosidase activities conferred by these *lacZ* fusions integrated into the chromosome of strain W3110 are shown qualitatively in colonies grown for 2 days on salt-free LB containing the indicator XG.**

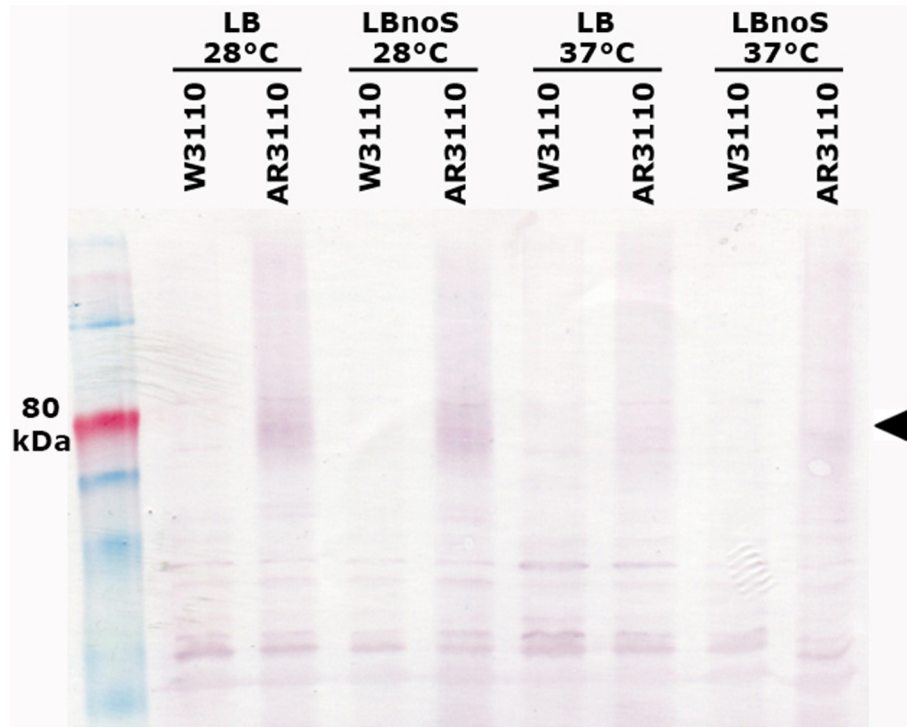

**Figure S2. FLAG-tagging reveals the expression and temperature regulation of cellulose synthase (BcsA) in strain AR3110 but not in W3110.** W3110 and AR3110 carrying FLAG-tagged *bcsA* in the chromosome were grown in LB or salt-free LB at 28°C or 37°C as indicated and FLAG-tagged proteins were detected in colonies growing for four days at 28 °C (40  $\mu$ g total protein per lane) by immunoblot analysis using an anti-FLAG serum. Note that as an overall hydrophobic membrane protein, BcsA runs as a diffuse band and more rapidly than expected for its actually molecular mass (99.8 kDa).

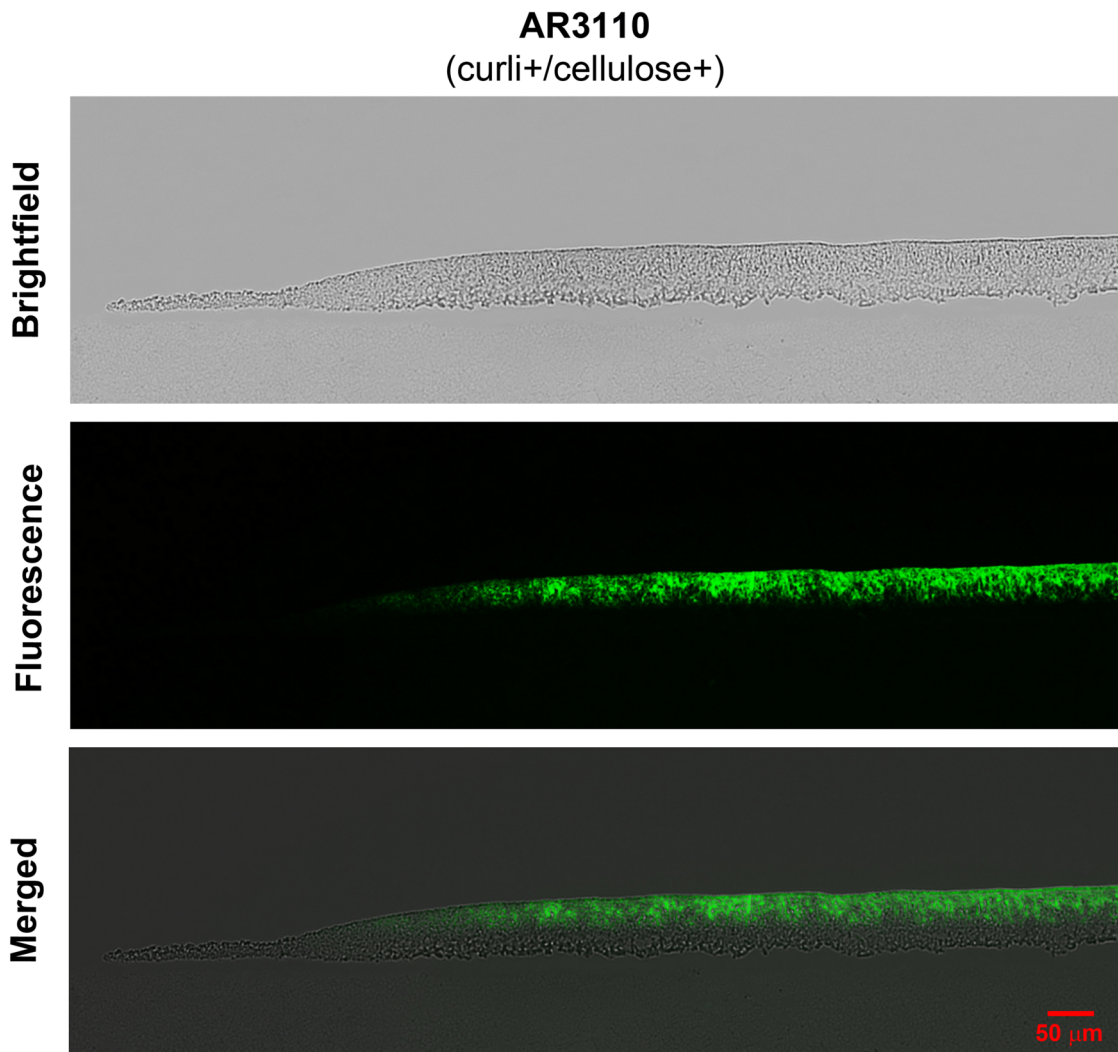

**Figure S3. Cryosection through the outer growth zone of a 5-day-old macrocolony of strain AR3110 grown in the presence of thioflavine S.** A thin section (5  $\mu$ m) of a representative AR3110 macrocolony was visualized at low magnification by brightfield and fluorescence microscopy, the latter was false-colored green for TS and the two images were merged. Brightfield in the merged image appears on a dark grey background to better visualize the location of the fluorescence.

**Table supplement 1.** Oligonucleotides used in this study.

**I. Primers for 2-step mutagenesis of *bcsQ* SNP<sup>1:2</sup>**

| Primer                   | Sequence                                                                                   |
|--------------------------|--------------------------------------------------------------------------------------------|
| <i>BcsQ</i> HP1<br>pKD54 | 5'-CTGCCTGATCCCGCGATAGGCTATATCTTCCAGAATGATATT<br>GTGGCGTTTCAGA <b>AGAACTCGTCAAGAAG</b> -3' |
| <i>bcsQ</i> HP2<br>pKD45 | 5'-TAGCGCAACCCAGCGTCACGCCAGTCCTGGCCATCCAGCA<br>TCGCTCTGGCCGGA <b>TATTATCGTGAGGATG</b> -3'  |
| <i>bcsQ</i> mut1 rev     | 5'-CTGGGATT <u>GC</u> AGGGGG -3'                                                           |
| <i>bcsQ</i> mut2 fw      | 5'-CCCTGCA <u>AT</u> CCCAGTACG -3'                                                         |

<sup>1</sup>Cat/Kan cassette-specific sequences are shown in **boldface**.

<sup>2</sup>mutation introduced at the natural SNP position is underlined.

**II. Primers for generating knockout mutations by one-step inactivation<sup>1</sup>**

|                      |                                                                                                                                                                                                    |
|----------------------|----------------------------------------------------------------------------------------------------------------------------------------------------------------------------------------------------|
| $\Delta bcsQ::cat$   | 5'- TGGCCGTA <b>CTGGGATTGCAGGGGGT</b> GCGGGGAGGCCGTGG<br>GGACAACAACCGT <b>GTAGGCTGGAGCTGCTTC</b> -3'<br>5'- TGGTGGGTTATCTGCGAGGCATCACGCGGTAAGT <b>CGATTA</b><br>AAATCCACTGCATATGAATATCCTCCTTAG -3' |
| $\Delta bcsEFG::kan$ | 5'- GATAAGTTTTAATTTCAATGGTAGGTTTATTTCTTAGCTTTC<br>GCTAGGT <b>GTAGGCTGGAGCTGCTTC</b> -3'<br>5'-TTACTGCGGGTAAGGCACCCAGTCGCCGCCGTT <b>CAGGCGA</b><br>ACGTACGGATTCCGGGGATCCGTCGACC -3'                 |
| $\Delta yhjR::cat$   | 5'- ATGAATAACAATGAACCAGATACTCTGCCTGATCCCGCGATAG<br>GCTATAT <b>GTGTAGGCTGGAGCTGCTTC</b> -3'<br>5'- CTACTTTTGTGCGCAA <b>ACTCTGCCAGCAACGGCCAGCGTTTT</b><br>AATGCCGCATATGAATATCCTCCTTAG -3'            |

<sup>1</sup>Cat/Kan cassette-specific sequences are shown in **boldface**.

**III. Primers for generating *lacZ* reporter fusions<sup>3</sup>**

|                     |                                                 |
|---------------------|-------------------------------------------------|
| <i>yhjR</i> EcoRI   | 5'-GCTCAGGA <b>ATTCTGATTCGCCAGACTGATAGC</b> -3' |
| <i>yhjR</i> HindIII | 5'-GCA <b>AGCTTGCAGAGTATCTGGTTCATT</b> -3'      |
| <i>bcsQ</i> HindIII | 5'-GCA <b>AGCTT</b> GATGGTTGTTGTCCCCACGCC -3'   |
| <i>bcsA</i> HindIII | 5'-GCA <b>AGCTT</b> GGATAAGCAACCACGGGTCAG -3'   |

<sup>3</sup>Restrictions sites are shown in **boldface**.

**IV. Primers used for C-terminally 3xFLAG-tagging of BcsA**

|                    |                                            |
|--------------------|--------------------------------------------|
| <i>bcsA</i> H1Flag | 5'-CGGCACAACCATCGGATCAGGCTTTGGCTCAACAA -3' |
| <i>bcsA</i> H2Flag | 5'-AAATCCAGAATAGTTTTCTTTTCATCGCGTTATCA -3' |
